# Supplementary material for: Impact of systematic medication review in emergency department on patients’ post-discharge outcomes—A randomized controlled clinical trial
Source: PubMed Central journal article supplement (PMC9484649; doi:10.1371/journal.pone.0274907), 2022-09-19
Supplement: pone.0274907.s003.pdf [file pone.0274907.s003.pdf]

### S3 Appendix Detailed description of the drug-related problems categories

**Table A. Description of drug-related problem categories.** All drugs documented in the patients' reconciled drug lists were assessed according to these categories during medication review. The utilized drug-related problem categorization is based on a validated medication review-tool[1].

| <b>Drug-related problems categories</b> | <b>Detailed description</b>                                                                                                                                                                                                                                   |
|-----------------------------------------|---------------------------------------------------------------------------------------------------------------------------------------------------------------------------------------------------------------------------------------------------------------|
| <b>Drug monitoring</b>                  | Therapeutic drug monitoring or laboratory monitoring was needed, for example for digoxin, warfarin, levothyroxine, antidiabetics, statins                                                                                                                     |
| <b>Adherence issues</b>                 | Intentionally, or unintentionally deviation from the intended usage of prescribed drugs                                                                                                                                                                       |
| <b>Adverse effects</b>                  | Symptoms or changed laboratory values that seems to be associated with drug treatment                                                                                                                                                                         |
| <b>Drug-interactions</b>                | Clinically relevant drug-interactions (both drug-drug interactions and drug-supplements/herbal preparations interactions were included)                                                                                                                       |
| <b>Non-optimal drug therapy</b>         | Adjustments in the patient's drug therapy (included both dose adjustments and temporarily stopping drug therapy) are needed due to:<br>- the acute situation<br>- reduced organ function (kidney failure, reduced liver function etc.)<br>- contraindications |
| <b>Unnecessary drug</b>                 | Drug treatment without indication according to guidelines                                                                                                                                                                                                     |
| <b>Drug-related ED visit</b>            | Considering all the above-mentioned categories, study pharmacists assessed if the current ED visit could be connected to one or more of the drugs used by the patient at admission                                                                            |

1. Ruths S, Viktil KK, Blix HS. [Classification of drug-related problems]. Tidsskr Nor Laegeforen 2007; 127 (23):3073-3076.
